# Supplementary material for: Optical coherence microscopy as a novel, non-invasive method for the 4D live imaging of early mammalian embryos
Source: PubMed Central journal article supplement (PMC5482811; doi:10.1038/s41598-017-04220-8), 2017-06-23
Supplement: 41598_2017_4220_MOESM1_ESM.pdf [file 41598_2017_4220_MOESM1_ESM.pdf]

# Supplementary materials:

## Optical coherence microscopy as a novel, non-invasive method for the 4D live imaging of early mammalian embryos

Karol Karnowski<sup>1</sup>, Anna Ajduk<sup>2,\*</sup>, Bartosz Wieloch<sup>3</sup>, Szymon Tamborski<sup>1</sup>, Krzysztof Krawiec<sup>3</sup>, Maciej Wojtkowski<sup>1,4</sup> & Maciej Szkulmowski<sup>1,\*</sup>

<sup>1</sup>Institute of Physics, Faculty of Physics, Astronomy and Informatics, Nicolaus Copernicus University, Grudziadzka 5, 87-100 Torun, Poland, <sup>2</sup>Department of Embryology, Faculty of Biology, University of Warsaw, Miecznikowa 1, 02-096 Warsaw, Poland, <sup>3</sup>Institute of Computing Science, Poznan University of Technology, Piotrowo 2, 60-965 Poznan, Poland, <sup>4</sup> Institute of Physical Chemistry, Polish Academy of Sciences, Kasprzaka 44/52, 01-224 Warsaw, Poland

\*Corresponding authors: [aajduk@biol.uw.edu.pl](mailto:aajduk@biol.uw.edu.pl) (AA), [maciej.szkulmowski@fizyka.umk.pl](mailto:maciej.szkulmowski@fizyka.umk.pl) (MS)

### Supplementary Videos captions

**Supplementary Video S1. Mouse zygote with two pronuclei.** (A) Bright field. (B, D, E) OCM. OCM data obtained with DTIsp #3 resampled to 240x240x240 voxels; consecutive slices in the XY (B), XZ (D) and YZ (E) planes are shown. (C) 3D visualization of automatic image segmentation of the OCM image, with the female pronucleus marked in blue, the male pronucleus marked in red, and the nucleoli marked in yellow.

**Supplementary Video S2. Mouse blastocyst.** (A) Bright field. (B, C, D) OCM. OCM data obtained with DTIsp #3 resampled to 240x240x240 voxels; consecutive slices in the XY (B), XZ (C) and YZ (D) planes are shown.

**Supplementary Video S3. Porcine parthenogenote with a single pronucleus.** (A) Bright field. (B, C, D) OCM. OCM data obtained with DTIsp #2 resampled to 240x240x240 voxels; consecutive slices in the XY (B), XZ (C) and YZ (D) planes are shown.

**Supplementary Video S4. Mouse prophase I oocyte at the non-surrounded nucleoli (NSN) stage.** (A) Bright field. (B) Hoechst 33342-stained chromatin visualized with fluorescence microscopy. (C, E, F) OCM. OCM data obtained with DTIsp #1 resampled to 240x240x240 voxels; consecutive slices in the XY (C), XZ (E) and YZ (F) planes are shown. (D) 3D visualization of automatic image segmentation of the OCM image, with the nucleus marked in red and the nucleolus marked in yellow.

**Supplementary Video S5. Mouse prophase I oocyte in transition from the non-surrounded nucleoli (NSN) stage to the surrounded nucleoli (SN) stage.** (A) Bright field. (B) Hoechst 33342-stained chromatin visualized with fluorescence microscopy. (C, E, F) OCM. OCM data obtained with DTIsp #1 resampled to 240x240x240 voxels; consecutive slices in the XY (C), XZ (E) and YZ (F) planes are shown. (D) 3D visualization of automatic image segmentation of the OCM image, with the nucleus marked in red and the nucleolus marked in yellow.

**Supplementary Video S6. Mouse prophase I oocyte at the surrounded nucleoli (SN) stage.** (A) Bright field. (B) Hoechst 33342-stained chromatin visualized with fluorescence microscopy. (C, E, F) OCM. OCM data obtained with DTIsp #1 resampled to 240x240x240 voxels; consecutive slices in the XY (C), XZ (E) and YZ (F) planes are shown. (D) 3D visualization of automatic image segmentation of the OCM image, with the nucleus marked in red and the nucleolus marked in yellow.

**Supplementary Video S7. Mouse metaphase II oocyte with a spindle placed perpendicularly to the XY plane.** (A) Bright field. (B) Hoechst 33342-stained chromatin visualized with fluorescence microscopy. (C, E, F) OCM. OCM data obtained with DTIsp #3 resampled to 240x240x240 voxels; consecutive slices in the XY (C), XZ (E) and YZ (F) planes are shown. (D) 3D visualization of automatic image segmentation of the OCM image, with the spindle marked in red.

**Supplementary Video S8. Mouse metaphase II oocyte with a spindle placed parallel to the XY plane.** (A) Bright field. (B) Hoechst 33342-stained chromatin visualized with fluorescence microscopy. (C, E, F) OCM. OCM data obtained with

43 DTIsp #3 resampled to 240x240x240 voxels; consecutive slices in the XY (C), XZ (E) and YZ (F) planes are shown. (D) 3D  
44 visualization of automatic image segmentation of the OCM image, with the spindle marked in red.

45 **Supplementary Video S9. Nocodazole-treated metaphase II oocyte that lacks a metaphase spindle.** (A) Bright field. (B)  
46 Hoechst 33342-stained chromatin visualized with fluorescence microscopy. (C, E, F) OCM. OCM data obtained with  
47 DTIsp #3 resampled to 240x240x240 voxels; consecutive slices in the XY (C), XZ (E) and YZ (F) planes are shown. (D) 3D  
48 visualization of automatic image segmentation of the OCM image, with the remains of metaphase spindle marked in red.

49 **Supplementary Video S10. Formation and movement of pronuclei in a mouse zygote subjected to time-lapse imaging.**  
50 (A) Bright field. (B-D, F-K) OCM data obtained with DTIsp #4 (300 V-sets acquired every 30 s for approximately 2.5 hrs).  
51 (B) XY, (C) XZ and (D) YZ slices from the OCM data processed with Procedure #1. Selected slices processed with  
52 Procedure #2 follow the position of the male and female pronuclei in the XY (F, G), XZ (H, I) and YZ (J, K) planes. All  
53 images were resampled to 240x240 pixels. (E) 3D visualization of automatic image segmentation of the OCM image obtained  
54 with Procedure #1, with the female pronucleus marked in pink, the male pronucleus marked in blue, and the nucleoli marked  
55 in yellow.

56 **Supplementary Video S11. 3D visualization of pronuclear trajectories in a mouse zygote tracked using our custom**  
57 **algorithm.** The same OCM dataset as in Supplementary Video 10 was used for this analysis. The female pronucleus and its  
58 trajectory are marked in pink, the male pronucleus and its trajectory are marked in blue, and the nucleoli are marked in yellow.

59 **Supplementary Video S12. Formation and movement of pronuclei in a nocodazole-treated mouse zygote subjected to**  
60 **time-lapse.** (A) Bright field. (B-D, F-K) OCM data obtained with DTIsp #4 (300 V-sets acquired every 30 s for approximately  
61 2.5 hrs). (B) XY, (C) XZ and (D) YZ slices from OCM data processed with Procedure #1. Selected slices follow the position  
62 of the male pronuclei in the (F, G) XY, (H, I) XZ and (J, K) YZ slices from the OCM data processed with Procedure #2  
63 follow the position of the male and female pronuclei in the XY (F, G), XZ (H, I) and YZ (J, K) planes. All of the images  
64 were resampled to 240x240 pixels. (E) 3D visualization of automatic image segmentation of the OCM image obtained with  
65 Procedure #1, with the female pronucleus marked in pink, the male pronucleus marked in blue, and the nucleoli marked in  
66 yellow. Nocodazole treatment leads to the accumulation of membranous structures in the zygote, which are visible in the  
67 OCM as white dots.

68 **Supplementary Video S13. 3D visualization of pronuclear trajectories in a nocodazole-treated mouse zygote tracked**  
69 **using our custom algorithm.** The same OCM dataset as in Supplementary Video 12 was used for this analysis. Nocodazole  
70 inhibits movement of the pronuclei towards each other and the cell center. The female pronucleus and its trajectory are marked  
71 in pink, the male pronucleus and its trajectory are marked in blue, and the nucleoli are marked in yellow.

72 **Supplementary Video S14. Mouse embryo at 1- to 2-cell transition subjected to a time-lapse imaging.** (A) Bright field.  
73 (B-D, F-H) OCM data obtained with DTIsp #5 (400 V-sets acquired every 120 s for 13.5 hrs). (B) XY, (C) XZ and (D) YZ  
74 slices from the OCM data processed with Procedure #1. XY (F), XZ (G) and YZ (H) slices from the OCM data processed  
75 with Procedure #2. All images were resampled to 240x240 pixels. (E) 3D visualization of automatic image segmentation of  
76 the OCM image obtained with Procedure #1, with the female pronucleus marked in dark blue, the male pronucleus marked in  
77 red, the spindle marked in cyan, the nuclei of the 2-cell embryo marked in light blue, and the nucleoli marked in yellow.

78

79 **Supplementary Tables**

80 **Supplementary Table S1. Differential time interval scanning protocols (DTIsp) used in our studies.**

81 See Supplementary Figure S1 for an explanation of the symbols.

| DTIsp name | V-scan                  |                    |                         |                                              |                      | V-set                  |                    | 4D V-set              |                   | Comb. 4D V-set      | Vset size [GB] | Total size [GB] |
|------------|-------------------------|--------------------|-------------------------|----------------------------------------------|----------------------|------------------------|--------------------|-----------------------|-------------------|---------------------|----------------|-----------------|
|            | T <sub>Ascan</sub> [us] | N <sub>Ascan</sub> | T <sub>Bscan</sub> [ms] | N <sub>Bscans</sub> /<br>N <sub>cBscan</sub> | N <sub>cBscans</sub> | T <sub>Vscan</sub> [s] | N <sub>Vscan</sub> | T <sub>Vset</sub> [s] | N <sub>Vset</sub> | N <sub>4DVset</sub> |                |                 |
| DTIsp #1   | 20                      | 500                | 11                      | 2                                            | 500                  | -                      | 1                  | 22                    | 10                | 10                  | 1.9            | 19              |
| DTIsp #2   | 20                      | 240                | 5.8                     | 1                                            | 240                  | 1.5                    | 10                 | 30                    | 10                | 10                  | 2.2            | 22              |
| DTIsp #3   | 20                      | 300                | 6.4                     | 2                                            | 70                   | 1                      | 10                 | 30                    | 10                | 10                  | 1.6            | 16              |
| DTIsp #4   | 20                      | 300                | 6.4                     | 2                                            | 70                   | 1                      | 10                 | 30                    | 300               | 10                  | 1.6            | 480             |
| DTIsp #5   | 20                      | 300                | 6.4                     | 2                                            | 70                   | 1                      | 10                 | 120                   | 400               | 10                  | 1.6            | 640             |

82 **Supplementary Table S2. Averaging techniques used with the differential time interval scanning protocols (DTIsp).**

| Procedure name | Temporal averaging |       |                | Spatial averaging |                              |
|----------------|--------------------|-------|----------------|-------------------|------------------------------|
|                | V-scan             | V-set | Comb. 4D V-set | Slice width [μm]  | Algorithm                    |
| Procedure #1   | Mean               | Mean  | Mean           | -                 | -                            |
| Procedure #2   | Mean               | Mean  | Mean           | 15                | minimum intensity projection |
| Procedure #3   | Mean               | Mean  | Mean           | 70                | maximum intensity projection |

83

84 **Supplementary Figures**

**A. Volume scan (V-scan); duration: < 1sec**

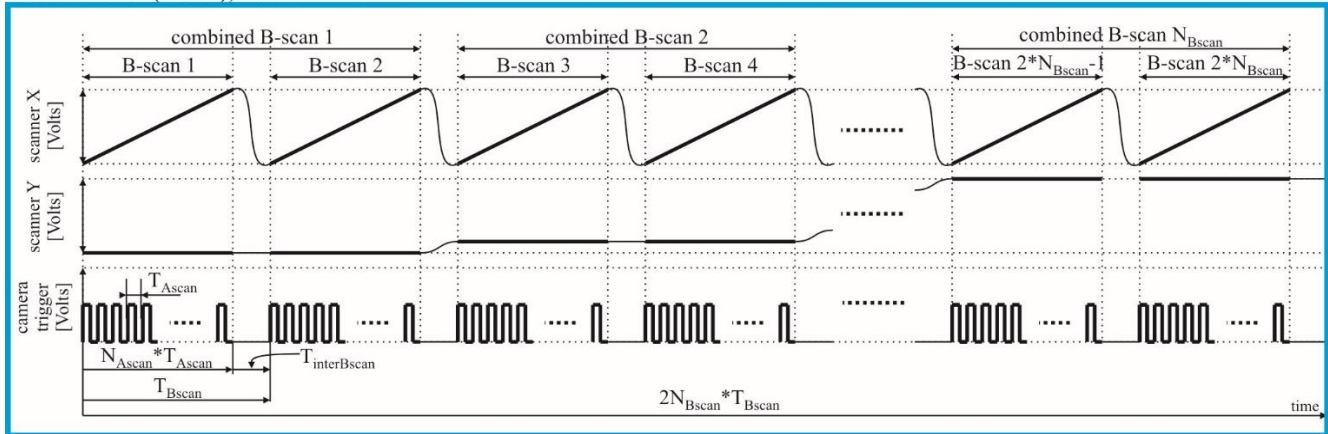

**B. V-set (set of V-scans); duration: ~10sec**

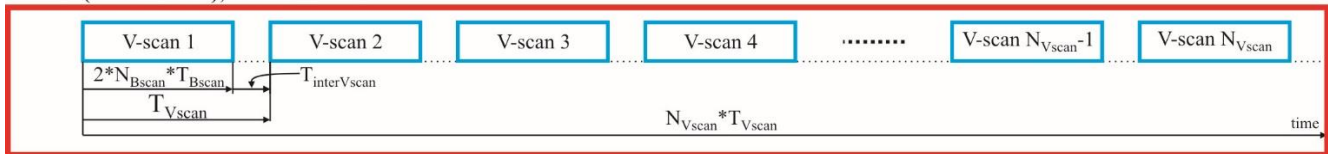

**C. 4D V-set (evolution of V-set in time); duration: hours**

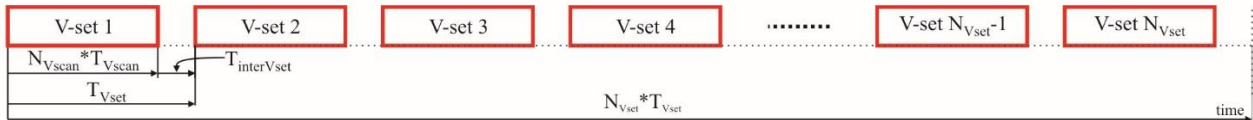

**D. Combined 4D V-set**

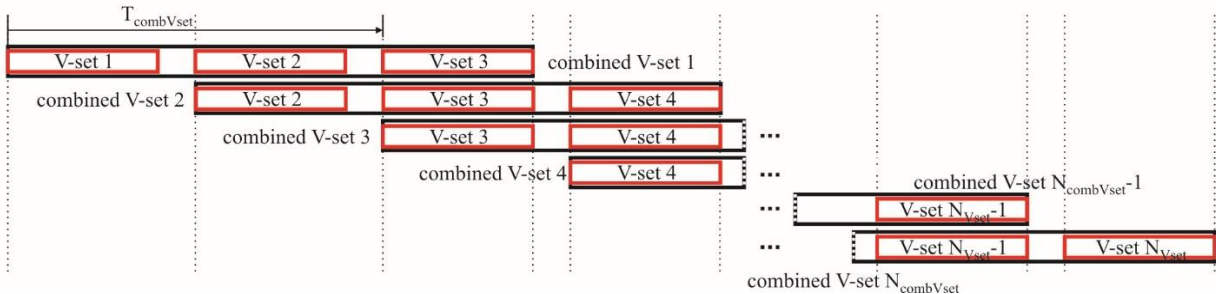

85

86 **Supplementary Figure S1. Scanning protocols for OCM.** (A) Electrical signals used to synchronize a pair of galvanometric  
 87 scanners that deflected the OCM light beam (scanner X & scanner Y) and the light spectrum acquisition events (camera  
 88 trigger). One A-scan (line with information about light scattering encoded in amplitude) is generated from each acquisition  
 89 event. Consecutive acquisitions of A-scans are conducted during constant motion of the light beam along the X lateral  
 90 direction to create a B-scan (a tomogram with brightness encoding information about the quantity of scattered light). Two B-  
 91 scans are acquired at the same lateral Y position and are used to create one combined B-scan. This technique is repeated for  
 92 all lateral Y positions, leading to a 3D distribution of the scattered light V-scan (volume tomogram). (B) A set of such volumes  
 93 is acquired in timespans of approximately one second. This set is used to form one 3D tomogram (V-set) with increased image  
 94 contrast due to speckle averaging compared with the single V-scan. (C) V-sets are acquired over prolonged periods of time  
 95 (tens of hours) to observe the 3D dynamics of cells inside the V-scan (4D V-set). (D) The V-sets forming the 4D V-set  
 96 are processed using the sliding window technique to further reduce the speckle noise. A new averaged 3D image (a combined V-  
 97 set) is generated from several V-sets. The next combined V-set is created from the same number of V-sets, but is shifted in  
 98 time (usually by one V-set). This procedure reduces the time resolution and ability to track fast processes but critically  
 99 improves the image quality.

## 100 Supplementary Information

### 101 Diversified Time Interval Scanning Protocol (DTIsp)

102 For the purposes of this study, we introduced a diversified time interval scanning protocol (DTIsp) that supports multiple time  
103 intervals between the acquisitions of consecutive OCM measurements (see Supplementary Figure S1). DTIsp enables  
104 researchers to perform a complex analysis of biological processes with different dynamics that occur in oocytes and embryos  
105 at the expense of data oversampling. Nonetheless, the oversampled data can be averaged to reduce speckles and produce high-  
106 quality structural images or were transformed with a wide spectrum of mathematic operations. The latter included operations  
107 such as difference, mean value, maximal value, minimal value or standard deviation and allowed us to attenuate or enhance  
108 particular structures on final OCM images.

109 We designed DTIsp protocols to support up to four different time intervals at which each single point within the 3D volume  
110 could be analyzed. Shortest time step, given by the CMOS camera repetition rate, defined the rate at which single axial scans  
111 (A-scans) are collected ( $T_{\text{Ascan}}$ ). For all of our measurements  $T_{\text{Ascan}}$  was set to 20  $\mu\text{s}$ . To create a 2D cross-section image (B-  
112 scan) A-scans were consecutively acquired while beam was scanning the sample along the X lateral direction. Period at which  
113 we collected B-scans ( $T_{\text{Bscan}}$ ) depended on number of A-scans and user defined inter B-scan time offset. At least two B-scans  
114 were acquired at the same Y position to be merged into a single combined B-scan. The procedure was repeated for all lateral  
115 Y positions and V-scans (3D volume scan) were acquired with  $T_{\text{Vscan}}$  period. A set of V-scans measured in timespan of  
116 approximately one second were averaged into one 3D tomogram (V-set) with increased contrast due to speckle reduction  
117 compared to single non-averaged V-scan. To study 3D cell dynamics V-sets were consecutively acquired at  $T_{\text{Vset}}$  ( $>20\text{s}$ ) period  
118 during prolonged measurements (tens of hours). To further reduce the speckle noise, we formed 4D V-sets using sliding  
119 window technique. A combined V-sets were generated from several V-sets shifted in time (usually by one  $T_{\text{Vset}}$ ). The latter  
120 approach, when applied, improves the image quality. However, time resolution and the ability to track fast cell processes is  
121 highly reduced in this case.

### 122 Automated Tracking of Zygote Dynamics

123 The cell segmentation procedure consists of several phases (see Supplementary Figure S2) aligned with the hierarchical  
124 structure of the cell: 1) extraction of the cell body, 2) detection of pronuclei, spindle or nuclei (depending on the phase of the  
125 process), and 3) segmentation of nucleoli. Each of these procedures requires experimental tuning of multiple parameters on  
126 the available sequences of 3D volumes produced by OCM. Once tuned, the procedures are fully automatic and capable of  
127 adapting to the varying characteristics of the frames and only require the intervention of an expert in the initial stage, where  
128 s/he is asked to roughly select the locations of both the male and female pronuclei in a single image (frame) in the sequence  
129 of 3D frames. Beginning with this frame, the algorithm traces the above-mentioned cellular structures forward and backward  
130 in time. For clarity, the description that follows refers to consecutive frames as 'previous', 'current', and 'next'; however, in  
131 practice, this order will be reversed when the structures are tracked backward in time (in which case, the procedures operate  
132 in the same way, except for monitoring the fusion of the pronuclei into the spindle and then the division to two separate  
133 nuclei).

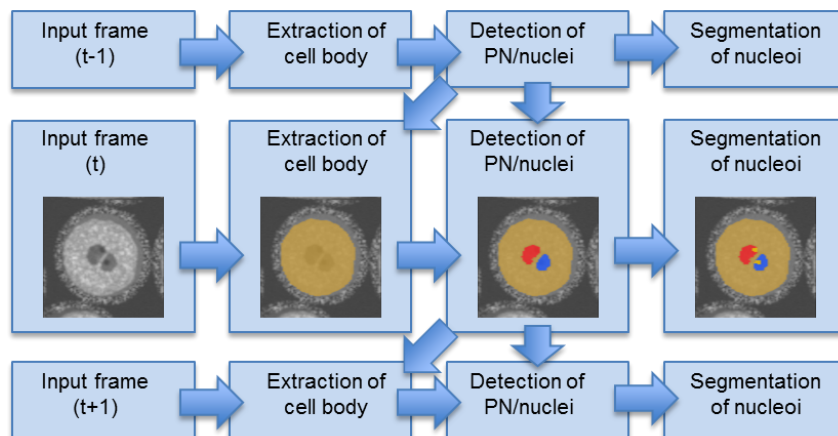

134

135 **Supplementary Figure S2. Workflow of the cell segmentation algorithm.** The segmented cell body is marked in orange,  
136 the pronuclei are marked in red and blue, and the nucleoli are marked in yellow.

137 In the preprocessing stage, we replaced the raw voxel values with their logarithms to compensate for the high dynamic range  
138 of the OCT signal.

139 1) We first blur the 3D image using a Gaussian filter with  $\sigma = 0.8$  voxels to segment the cell body. Next, for each 2D layer  
140 at a given depth  $z$  (for each  $z$  coordinate) in the 3D frame, we calculate a separate threshold,  $t_z$ , using Otsu's method<sup>1</sup>. To  
141 make the segmentation more robust,  $t_z$  is then averaged with the analogous thresholds obtained for the 50 nearest layers, i.e.,  
142 from  $t_z - 25$  to  $t_z + 25$ , resulting in the adjusted threshold  $t_z'$ . Next, the thresholds are used to classify the voxels in each  
143 layer; the voxels in the  $z$ th layer with values greater than  $t_z'$  are assumed to represent the cell. Because some cell structures,  
144 like pronuclei, are much darker than the cell body in OCM, their voxels may have lower values than  $t_z'$  and form 3D 'holes'  
145 (cavities) in the thresholding outcome. We label all such holes as cell bodies to obtain a continuous 3D region of adjacent  
146 labeled voxels that includes these structures. We then apply a morphological opening to remove the very small or narrow  
147 parts of the cell body. This process may lead to several isolated objects, the largest of which (in terms of the volume) is  
148 assumed to be the cell body.

149 When the male pronucleus is very close to the cell border, the adjacent cell membrane may not be clearly rendered, and the  
150 above procedure may lead to an apparent cavity on the cell surface. We incorporate the information on the locations of  
151 pronuclei in the previous frame (estimated using the method described below in 2), when available, to overcome this problem.  
152 First, we identify the points located on the junction of three regions: the cell body detected in the current frame, the pronuclei  
153 detected in the previous frame, and the background detected in the current frame. Next, we build a 3D convex hull on these  
154 junction voxels, and label all points in the hull as belonging to the cell body. Finally, we fill with labels any cavities that might  
155 have resulted from that process; thus, the result is guaranteed to form a continuous 3D region of adjacent labeled voxels.

156 2) Once the cell body is extracted from a frame, we detect the pronuclei or a spindle, depending on the phase of cell cycle  
157 being analyzed. In both cases, the procedure works almost identically; therefore, we refer to both pronuclei and a spindle as  
158 'objects' in the subsequent steps. The detection algorithm only considers the voxels labeled as the cell body by the cell  
159 segmentation procedure presented in (1). For each object detected in the previous frame, we calculate the Otsu threshold  $ot$   
160 from the corresponding voxels in the current frame. The threshold is slightly decreased to  $ot' = 0.85 \cdot ot + 0.15 \cdot mbv$ , where  
161  $mbv$  is the mean value of voxels below  $ot$  (background voxels).

162 For the frames that contain the spindle, the distribution of voxel values in the cell body is usually significantly different from  
163 the distribution in the remaining frames, which required us to cap the threshold at a fixed value of 9.2. Additionally, because  
164 the voxels near the cell surface are a bit darker than those throughout the cell interior, we slightly increased their values such  
165 that they are less likely to be labeled as a pronucleus.

166 For each object identified in the previous frame, we approximate it with a small ellipsoid and scale it down. The voxels in the  
167 current frame inside the ellipsoid then form 'seeds' for the watershed segmentation algorithm described below. First, we insert  
168 all seed points, the information about the object's label (e.g., 'male pronuclei') and the lowest possible priority into a priority  
169 queue. Next, we obtain the head element, i.e., the point with the lowest priority and its required label from the queue. If the  
170 extracted point is not a seed and fewer than three of its neighbors either have the same label or are candidates to receive the  
171 same label, then this point is only marked as a candidate to receive that label and is removed from the queue. In the other case,  
172 the point is definitively labeled, and all of its neighbors are added to the priority queue. The priority of each added point is  
173 calculated as the absolute difference between the value of the just labeled point and that of the added point. We ignore all  
174 points with values above the  $ot'$  threshold and points that have been already labeled. The process is repeated until the priority  
175 queue is empty.

176 Once watershed segmentation is completed, we apply the morphological closing operation to the labeled voxels, fill any 3D  
177 cavities in the labeled objects (in the same way as when segmenting the cell body in 1), and finally keep only the objects that  
178 contain a center of any object detected in the previous frame. Each object segmented in this way is then approximated with  
179 an ellipsoid; among others, that ellipsoid is used to seed the watershed segmentation in the next frame, as mentioned above.

180 Next, we verify whether the center of each ellipsoid lies inside the object detected in the previous image. If not, the  
181 corresponding object is labeled as a non-pronucleus (implying that it may represent other cell structures).

182 As mandated by the underlying biological process, the pronuclei merge at a certain time point to form the spindle, which  
183 requires special handling. We merge two pronuclei and label it as a spindle if (i) they have adjacent voxels and (ii) there is no  
184 clear partition between them in terms of voxel values. We temporarily merge both adjacent pronuclei into one region and  
185 apply the Multi Otsu method with two thresholds to verify the latter condition<sup>2</sup>. Next, we threshold the merged region with

186 the lower of the resulting Otsu thresholds. If the thresholding leads to one continuous region, it is labeled as a spindle;  
187 otherwise, the pronuclei are still considered independent.

188 We monitor the changes in the shape of each traced spindle to detect the potential nuclear division. In this step, we first  
189 approximate the positions of the spindle in the previous and current frame with ellipsoids, and retrieve their longest axes,  
190  $L_{prev}$  and  $L_{curr}$ , respectively. If  $L_{curr} + 5 < L_{prev}$  and  $L_{curr} / L_{prev} < 0.7$ , we consider these values as a significant change in the  
191 shape and/or volume of a spindle, and attempt to detect the objects again. Therefore, we apply a procedure based on the Multi  
192 Otsu method<sup>2</sup> and watershed segmentation described above. If the procedure succeeds at detecting two new objects that  
193 overlap with one spindle in the previous frame, nuclear division is detected.

194 3) The last step of automatic image segmentation is to detect the nucleoli inside the pronuclei or nuclei (in case of 2-cell  
195 embryos). This procedure processes each pronucleus or nucleus (i.e., object) separately. First, we calculate the average voxel  
196 value  $m$  of the given object, and set all voxels outside the object to  $m$ . Next, adaptive thresholding is used to detect the darker  
197 areas, which are considered potential nucleoli. The threshold is calculated by convolving the image with a Gaussian filter and  
198 subtracting a constant. Finally, we apply the morphological closing operation to merge the regions that are close to each other.  
199 Each resulting isolated region is considered a separate nucleolus.

200 When carefully tuned, these methods successfully detected all required cellular structures in the sequences of raw OCT frames.  
201 Only one sequence required additional manual marking of areas that should not be classified as part of the pronucleus.  
202 However, only one frame in that sequence had to be marked in this way; the markers were then properly propagated to  
203 consecutive frames and thus no other frames required manual marking.

## 204 **References**

- 205 1 Otsu, N. Threshold selection method from gray-level histograms. *IEEE Trans. Syst. Man. Cyb.* **9**, 62-66 (1979).  
206 2 Liao, P.S., Chew, T.S. & Chung, P.C.A fast algorithm for multilevel thresholding. *J. Inf. Sci. Eng.* **17**, 713-727  
207 (2001).
